# Supplementary material for: Novel fascial mapping of muscle spindles distribution: insights from a murine model study
Source: Front Physiol. 2025 May 1;16:1571500. doi: 10.3389/fphys.2025.1571500 (PMC12078280; doi:10.3389/fphys.2025.1571500)
Supplement: Supplementary file 1 [file Table1.xlsx]

## Sheet: quantity of perimysium
Ms	Max No. of directions	Min No. of directions
No.1	4	2
No.3	4	4
No.4	3	3
No.5	4	3
No.6	3	2
No.7	4	2
No.8	3	2
No.9	6	5
No.11	3	2
No.12	2	2
No.13	3	2
No.14	3	3
No.15	3	2
No.16	3	1
No.17	3	3
No.19	3	2
No.21	3	2
No.22	3	2
No.23	2	2
No.24	2	2

## Sheet: thickness
MS No.	Thickness (Max)	Thickness (Min)
No. 1	7.715	3.347
No.3	6.695	3.017
No.4	9.013	3.55
No.5	5.358	3.347
No.6	10.485	2.51
No.7	6.536	2.646
No.8	9.541	2.51
No.9	6.695	3.017
No.11	6.092	5.021
No.13	10.879	2.367
No.14	4.184	3.45
No.15	6.747	3.017
No.16	6.901	3.347
No.18	7.485	4.184
No.19	5.09	3.347
No.21	6.747	4.267
No.22	7.101	3.45
No.23	7.715	1.871

## Sheet: surface area
	Area (μm2)
No.1	942.094
No.3	1227.8
No.4	1081.45
No.5	939.526
No.6	1394.7
No.7	1712.62
No.8	671.09
No.9	2343.33
No.11	1012.59
No.13	932.99
No.14	1196.29
No.16	684.162
No.18	1518.41
No.19	1246.01
No.21	709.838
No.22	706.57
No.23	1775.41

## Sheet: info. of human sample
No. of human muscle	Muscle	Gender	Age
HN-5-1 DEL	deltoid muscle	M	27
HN11-RF	rectus femoris	M	18
HN-36 Fibularis B	fibularis brevis	M	49
HN30-VL2	vastus lateralis	F	85
HN31QF	quadratus femoris muscles	F	95
HN49-TA	tibialis anterior	F	36
HN56-DEL	deltoid muscle	M	63
HN4-DEL	deltoid muscle	M	41
